# Supplementary material for: Cloning, sequencing, and expression analysis of 32 NAC transcription factors (MdNAC) in apple
Source: PeerJ. 2020 May 6;8:e8249. doi: 10.7717/peerj.8249 (PMC7210808; doi:10.7717/peerj.8249)
Supplement: File S3 [file peerj-08-8249-s005.xlsx]

## Sheet: Sheet1
	Control			Mannitol			NaCl
	0h	24h	48h	0h	24h	48h	0h	24h	48h
MdNAC24	1.003	1.0481	0.944753	1.01157	0.235004	0.242217	1.00262	2.6557	19.3305
MdNAC25	1.00123	0.878165	1.13373	1.00461	0.879229	1.10507	1.0218	1.07687	1.28379
MdNAC26	1.00187	1.02387	0.844458	1.00452	1.32542	1.19446	1.00993	1.31863	1.34688
MdNAC27	1.00218	1.3089	0.895416	1.00861	0.823922	1.06474	1.02819	12.28	3.64533
MdNAC28	1.00019	1.03332	1.01446	1.00388	0.49907	0.45241	1.00534	1.11894	1.51403
MdNAC29	1.01092	1.21639	1.02412	1.01226	1.5107	1.41043	1.00519	5.11447	2.74301
MdNAC30	1.00662	0.81041	0.99921	1.00566	0.381857	0.623352	1.00224	1.21362	1.64728
MdNAC31	1.00262	0.906528	1.06736	1.00211	1.1212	0.807445	1.01258	1.50209	1.56804
MdNAC32	1.00742	1.12783	0.928547	1.00015	1.08306	2.47819	1.00089	1.16769	1.18348
MdNAC33	1.00365	0.946667	1.26004	1.00272	0.408034	0.556697	1.00294	0.723523	0.765244
MdNAC34	1.0043	1.05432	0.80103	1.00379	0.758841	1.59906	1.00768	2.0927	2.93186
MdNAC35	1.00143	1.06264	1.20097	1.00466	0.459142	1.14927	1.01829	1.24044	1.17342
MdNAC36	1.01985	0.931277	1.18907	1.00448	0.834554	0.905301	1.00531	0.830287	0.981056
MdNAC37	1.01082	0.854808	0.997232	1.00197	0.25174	0.380579	1.01911	1.19551	3.91214
MdNAC38	1.00553	1.04508	1.01142	1.00343	0.832086	0.775271	1.00187	1.71473	1.85002
MdNAC39	1.00107	1.0117	1.11552	1.00042	0.732455	1.22505	1.0147	2.406	3.19474
MdNAC54	1.00367	1.30163	0.939677	1.00465	0.909828	1.91699	1.01978	1.70885	4.89149
MdNAC55	1.01014	1.11338	1.10914	1.00633	0.45301	0.221972	1.00118	1.14213	0.917883
MdNAC56	1.00996	1.21973	1.1306	1.01196	0.0513219	0.133402	1.00364	1.32684	0.957612
MdNAC57	1.0241	1.21793	1.09351	1.00431	0.803796	0.918905	1.0002	1.02899	1.13275
MdNAC58	1.00286	1.14559	1.11715	1.00269	0.290807	0.431735	1.00009	0.783931	0.982658
MdNAC59	1.00255	1.18825	0.986892	1.0032	0.839984	0.964471	1.00043	2.63257	2.60167
MdNAC60	1.01597	0.997385	0.93015	1.00939	0.712903	1.11658	1.01791	0.711362	0.942567
MdNAC61	1.00186	0.937352	0.898872	1.00496	0.957085	0.659562	0.960148	1.4176	1.04592
MdNAC62	1.00998	1.1892	1.01411	1.00142	1.08158	0.374625	1.00196	0.855295	1.05513
MdNAC63	1.00151	0.920628	0.986256	1.00329	0.805936	1.0624	1.00794	2.35424	3.72216
MdNAC64	1.01204	1.16598	0.978511	1.00619	1.31164	1.12768	1.00478	1.13502	1.16303
MdNAC65	1.00689	1.27721	1.08907	1.00606	1.08357	0.887683	1.00459	1.18165	0.855501
MdNAC67	1.00564	1.16084	1.15227	1.01982	0.955326	1.24041	1.00105	1.19024	1.0024
MdNAC68	1.00003	1.02288	1.22755	1.00248	0.807213	0.810686	1.00555	1.20922	1.34433
MdNAC69	1.00155	1.16856	1.13525	1.02608	0.59139	0.821625	1.00246	0.968267	1.18737
MdNAC70	1.00689	1.27721	1.07207	1.01575	0.889467	1.05145	1.03176	0.877646	1.33473
