# Supplementary material for: Cloning, sequencing, and expression analysis of 32 NAC transcription factors (MdNAC) in apple
Source: PeerJ. 2020 May 6;8:e8249. doi: 10.7717/peerj.8249 (PMC7210808; doi:10.7717/peerj.8249)
Supplement: Table S2 [file peerj-08-8249-s002.xlsx]

## Sheet: Sheet1
Seq Name	Description	Length	Hits	e-Value	sim mean	GO	GO IDs	GO Names	InterPro IDs	InterPro GO IDs	InterPro GO Names
MdNAC24	NAC domain-containing protein 86-like	1056	20	0	89.78	3	F:GO:0003677; C:GO:0005634; P:GO:0006355	F:DNA binding; C:nucleus; P:regulation of transcription, DNA-templated	IPR003441 (PFAM); IPR036093 (G3DSA:3.30.310.GENE3D); mobidb-lite (MOBIDB_LITE); mobidb-lite (MOBIDB_LITE); mobidb-lite (MOBIDB_LITE); PTHR31989 (PANTHER); PTHR31989:SF229 (PANTHER); IPR003441 (PROSITE_PROFILES); IPR036093 (SUPERFAMILY)	F:GO:0003677; P:GO:0006355	F:DNA binding; P:regulation of transcription, DNA-templated
MdNAC25	NAC domain-containing protein 7-like	1335	20	0	82.86	3	F:GO:0003677; C:GO:0005634; P:GO:0006355	F:DNA binding; C:nucleus; P:regulation of transcription, DNA-templated	IPR003441 (PFAM); IPR036093 (G3DSA:3.30.310.GENE3D); PTHR31989 (PANTHER); PTHR31989:SF200 (PANTHER); IPR003441 (PROSITE_PROFILES); IPR036093 (SUPERFAMILY)	F:GO:0003677; P:GO:0006355	F:DNA binding; P:regulation of transcription, DNA-templated
MdNAC26	NAC domain-containing protein 17	2103	20	0	81.26	4	F:GO:0003677; C:GO:0005634; P:GO:0006355; C:GO:0016021	F:DNA binding; C:nucleus; P:regulation of transcription, DNA-templated; C:integral component of membrane	IPR003441 (PFAM); IPR036093 (G3DSA:3.30.310.GENE3D); PTHR31989 (PANTHER); PTHR31989:SF205 (PANTHER); IPR003441 (PROSITE_PROFILES); IPR036093 (SUPERFAMILY)	F:GO:0003677; P:GO:0006355	F:DNA binding; P:regulation of transcription, DNA-templated
MdNAC27	NAC domain-containing protein 100	1056	20	0	87.51	3	F:GO:0003677; C:GO:0005634; P:GO:0006355	F:DNA binding; C:nucleus; P:regulation of transcription, DNA-templated	IPR003441 (PFAM); IPR036093 (G3DSA:3.30.310.GENE3D); mobidb-lite (MOBIDB_LITE); mobidb-lite (MOBIDB_LITE); PTHR31744:SF90 (PANTHER); PTHR31744 (PANTHER); IPR003441 (PROSITE_PROFILES); IPR036093 (SUPERFAMILY)	F:GO:0003677; P:GO:0006355	F:DNA binding; P:regulation of transcription, DNA-templated
MdNAC28	NAC transcription factor 29-like	1011	20	3.79261e-158	80.18	3	F:GO:0003677; C:GO:0005634; P:GO:0006355	F:DNA binding; C:nucleus; P:regulation of transcription, DNA-templated	IPR003441 (PFAM); IPR036093 (G3DSA:3.30.310.GENE3D); PTHR31719 (PANTHER); IPR003441 (PROSITE_PROFILES); IPR036093 (SUPERFAMILY)	F:GO:0003677; P:GO:0006355	F:DNA binding; P:regulation of transcription, DNA-templated
MdNAC29	NAC domain-containing protein 82-like	1371	20	0	83.55	4	F:GO:0003677; C:GO:0005634; P:GO:0006355; C:GO:0016021	F:DNA binding; C:nucleus; P:regulation of transcription, DNA-templated; C:integral component of membrane	IPR036093 (G3DSA:3.30.310.GENE3D); IPR003441 (PFAM); mobidb-lite (MOBIDB_LITE); PTHR31989 (PANTHER); PTHR31989:SF248 (PANTHER); IPR003441 (PROSITE_PROFILES); IPR036093 (SUPERFAMILY)	F:GO:0003677; P:GO:0006355	F:DNA binding; P:regulation of transcription, DNA-templated
MdNAC30	NAC domain-containing protein 104 isoform X1	854	20	1.15963e-112	91.52	3	F:GO:0003677; C:GO:0005634; P:GO:0006355	F:DNA binding; C:nucleus; P:regulation of transcription, DNA-templated	IPR036093 (G3DSA:3.30.310.GENE3D); IPR003441 (PFAM); PTHR31719:SF131 (PANTHER); PTHR31719 (PANTHER); IPR003441 (PROSITE_PROFILES); IPR036093 (SUPERFAMILY)	F:GO:0003677; P:GO:0006355	F:DNA binding; P:regulation of transcription, DNA-templated
MdNAC31	filaggrin-2-like isoform X1	2453	20	0	80.6	3	F:GO:0003677; C:GO:0005634; P:GO:0006355	F:DNA binding; C:nucleus; P:regulation of transcription, DNA-templated	IPR036093 (G3DSA:3.30.310.GENE3D); IPR003441 (PFAM); mobidb-lite (MOBIDB_LITE); mobidb-lite (MOBIDB_LITE); mobidb-lite (MOBIDB_LITE); mobidb-lite (MOBIDB_LITE); PTHR31989 (PANTHER); PTHR31989:SF217 (PANTHER); IPR003441 (PROSITE_PROFILES); IPR036093 (SUPERFAMILY)	F:GO:0003677; P:GO:0006355	F:DNA binding; P:regulation of transcription, DNA-templated
MdNAC32	NAC domain-containing protein 86 isoform X1	2179	20	0	93	3	F:GO:0003677; C:GO:0005634; P:GO:0006355	F:DNA binding; C:nucleus; P:regulation of transcription, DNA-templated	IPR036093 (G3DSA:3.30.310.GENE3D); IPR003441 (PFAM); PTHR31989:SF6 (PANTHER); PTHR31989 (PANTHER); IPR003441 (PROSITE_PROFILES); IPR036093 (SUPERFAMILY)	F:GO:0003677; P:GO:0006355	F:DNA binding; P:regulation of transcription, DNA-templated
MdNAC33	NAC domain-containing protein 105-like isoform X1	1380	20	0	74.95	2	F:GO:0003677; P:GO:0006355	F:DNA binding; P:regulation of transcription, DNA-templated	IPR036093 (G3DSA:3.30.310.GENE3D); IPR003441 (PFAM); mobidb-lite (MOBIDB_LITE); PTHR31989:SF203 (PANTHER); PTHR31989 (PANTHER); IPR003441 (PROSITE_PROFILES); IPR036093 (SUPERFAMILY)	F:GO:0003677; P:GO:0006355	F:DNA binding; P:regulation of transcription, DNA-templated
MdNAC34	NAC domain-containing protein 2-like	1333	20	0	83.6	3	F:GO:0003677; C:GO:0005634; P:GO:0006355	F:DNA binding; C:nucleus; P:regulation of transcription, DNA-templated	IPR003441 (PFAM); IPR036093 (G3DSA:3.30.310.GENE3D); mobidb-lite (MOBIDB_LITE); mobidb-lite (MOBIDB_LITE); mobidb-lite (MOBIDB_LITE); mobidb-lite (MOBIDB_LITE); PTHR31719 (PANTHER); PTHR31719:SF16 (PANTHER); IPR003441 (PROSITE_PROFILES); IPR036093 (SUPERFAMILY)	F:GO:0003677; P:GO:0006355	F:DNA binding; P:regulation of transcription, DNA-templated
MdNAC35	NAC domain-containing protein 86	1020	20	3.18752e-177	85.98	3	F:GO:0003677; C:GO:0005634; P:GO:0006355	F:DNA binding; C:nucleus; P:regulation of transcription, DNA-templated	IPR036093 (G3DSA:3.30.310.GENE3D); IPR003441 (PFAM); mobidb-lite (MOBIDB_LITE); mobidb-lite (MOBIDB_LITE); PTHR31989 (PANTHER); PTHR31989:SF268 (PANTHER); IPR003441 (PROSITE_PROFILES); IPR036093 (SUPERFAMILY)	F:GO:0003677; P:GO:0006355	F:DNA binding; P:regulation of transcription, DNA-templated
MdNAC36	NAC domain-containing protein 43-like	1269	20	0	84.12	3	F:GO:0003677; C:GO:0005634; P:GO:0006355	F:DNA binding; C:nucleus; P:regulation of transcription, DNA-templated	IPR036093 (G3DSA:3.30.310.GENE3D); IPR003441 (PFAM); mobidb-lite (MOBIDB_LITE); mobidb-lite (MOBIDB_LITE); PTHR31989 (PANTHER); PTHR31989:SF246 (PANTHER); IPR003441 (PROSITE_PROFILES); IPR036093 (SUPERFAMILY)	F:GO:0003677; P:GO:0006355	F:DNA binding; P:regulation of transcription, DNA-templated
MdNAC37	NAC domain-containing protein 68-like	1860	20	0	81.12	2	F:GO:0003677; P:GO:0006355	F:DNA binding; P:regulation of transcription, DNA-templated	IPR036093 (G3DSA:3.30.310.GENE3D); IPR003441 (PFAM); PTHR31989 (PANTHER); PTHR31989:SF203 (PANTHER); IPR003441 (PROSITE_PROFILES); IPR036093 (SUPERFAMILY)	F:GO:0003677; P:GO:0006355	F:DNA binding; P:regulation of transcription, DNA-templated
MdNAC38	NAC domain-containing protein 41-like	1134	20	0	75.35	2	F:GO:0003677; P:GO:0006355	F:DNA binding; P:regulation of transcription, DNA-templated	IPR036093 (G3DSA:3.30.310.GENE3D); IPR003441 (PFAM); mobidb-lite (MOBIDB_LITE); mobidb-lite (MOBIDB_LITE); mobidb-lite (MOBIDB_LITE); PTHR31989 (PANTHER); PTHR31989:SF235 (PANTHER); IPR003441 (PROSITE_PROFILES); IPR036093 (SUPERFAMILY)	F:GO:0003677; P:GO:0006355	F:DNA binding; P:regulation of transcription, DNA-templated
MdNAC39	NAC domain-containing protein 5-like isoform X1	2116	20	0	70.98	2	F:GO:0003677; P:GO:0006355	F:DNA binding; P:regulation of transcription, DNA-templated	IPR036093 (G3DSA:3.30.310.GENE3D); IPR003441 (PFAM); mobidb-lite (MOBIDB_LITE); mobidb-lite (MOBIDB_LITE); PTHR31989:SF203 (PANTHER); PTHR31989 (PANTHER); IPR003441 (PROSITE_PROFILES); IPR036093 (SUPERFAMILY)	F:GO:0003677; P:GO:0006355	F:DNA binding; P:regulation of transcription, DNA-templated
MdNAC54	NAC domain-containing protein 37-like	1383	20	0	93.04	3	F:GO:0003677; C:GO:0005634; P:GO:0006355	F:DNA binding; C:nucleus; P:regulation of transcription, DNA-templated	IPR003441 (PFAM); IPR036093 (G3DSA:3.30.310.GENE3D); PTHR31989 (PANTHER); PTHR31989:SF107 (PANTHER); IPR003441 (PROSITE_PROFILES); IPR036093 (SUPERFAMILY)	F:GO:0003677; P:GO:0006355	F:DNA binding; P:regulation of transcription, DNA-templated
MdNAC55	NAC domain-containing protein 43-like	1387	20	0	82.67	6	C:GO:0005634; P:GO:0009834; P:GO:0010047; F:GO:0042802; F:GO:0043565; P:GO:0045893	C:nucleus; P:plant-type secondary cell wall biogenesis; P:fruit dehiscence; F:identical protein binding; F:sequence-specific DNA binding; P:positive regulation of transcription, DNA-templated	IPR003441 (PFAM); IPR036093 (G3DSA:3.30.310.GENE3D); mobidb-lite (MOBIDB_LITE); mobidb-lite (MOBIDB_LITE); PTHR31989 (PANTHER); PTHR31989:SF138 (PANTHER); IPR003441 (PROSITE_PROFILES); IPR036093 (SUPERFAMILY)	F:GO:0003677; P:GO:0006355	F:DNA binding; P:regulation of transcription, DNA-templated
MdNAC56	NAC domain-containing protein 83-like	863	20	1.44839e-157	84.59	3	F:GO:0003677; C:GO:0005634; P:GO:0006355	F:DNA binding; C:nucleus; P:regulation of transcription, DNA-templated	IPR003441 (PFAM); IPR036093 (G3DSA:3.30.310.GENE3D); mobidb-lite (MOBIDB_LITE); PTHR31719:SF139 (PANTHER); PTHR31719 (PANTHER); IPR003441 (PROSITE_PROFILES); IPR036093 (SUPERFAMILY)	F:GO:0003677; P:GO:0006355	F:DNA binding; P:regulation of transcription, DNA-templated
MdNAC57	NAC domain-containing protein 69-like isoform X1	1945	20	0	76.17	2	F:GO:0003677; P:GO:0006355	F:DNA binding; P:regulation of transcription, DNA-templated	IPR003441 (PFAM); IPR036093 (G3DSA:3.30.310.GENE3D); mobidb-lite (MOBIDB_LITE); mobidb-lite (MOBIDB_LITE); mobidb-lite (MOBIDB_LITE); mobidb-lite (MOBIDB_LITE); mobidb-lite (MOBIDB_LITE); PTHR31989 (PANTHER); PTHR31989:SF203 (PANTHER); IPR003441 (PROSITE_PROFILES); IPR036093 (SUPERFAMILY)	F:GO:0003677; P:GO:0006355	F:DNA binding; P:regulation of transcription, DNA-templated
MdNAC58	NAC domain-containing protein 7-like	1440	20	0	92.03	3	F:GO:0003677; C:GO:0005634; P:GO:0006355	F:DNA binding; C:nucleus; P:regulation of transcription, DNA-templated	IPR003441 (PFAM); IPR036093 (G3DSA:3.30.310.GENE3D); PTHR31989:SF197 (PANTHER); PTHR31989 (PANTHER); IPR003441 (PROSITE_PROFILES); IPR036093 (SUPERFAMILY)	F:GO:0003677; P:GO:0006355	F:DNA binding; P:regulation of transcription, DNA-templated
MdNAC59	NAC domain-containing protein 35 isoform X1	1807	20	0	84.57	3	F:GO:0003677; C:GO:0005634; P:GO:0006355	F:DNA binding; C:nucleus; P:regulation of transcription, DNA-templated	IPR036093 (G3DSA:3.30.310.GENE3D); IPR003441 (PFAM); mobidb-lite (MOBIDB_LITE); mobidb-lite (MOBIDB_LITE); mobidb-lite (MOBIDB_LITE); mobidb-lite (MOBIDB_LITE); PTHR31744:SF70 (PANTHER); PTHR31744 (PANTHER); IPR003441 (PROSITE_PROFILES); IPR036093 (SUPERFAMILY)	F:GO:0003677; P:GO:0006355	F:DNA binding; P:regulation of transcription, DNA-templated
MdNAC60	NAC domain-containing protein 79-like	1901	20	0	75.99	3	F:GO:0003677; C:GO:0005634; P:GO:0006355	F:DNA binding; C:nucleus; P:regulation of transcription, DNA-templated	IPR003441 (PFAM); IPR036093 (G3DSA:3.30.310.GENE3D); mobidb-lite (MOBIDB_LITE); mobidb-lite (MOBIDB_LITE); mobidb-lite (MOBIDB_LITE); PTHR31744 (PANTHER); PTHR31744:SF92 (PANTHER); IPR003441 (PROSITE_PROFILES); IPR036093 (SUPERFAMILY)	F:GO:0003677; P:GO:0006355	F:DNA binding; P:regulation of transcription, DNA-templated
MdNAC61	SUPPRESSOR OF GAMMA RESPONSE 1	1731	20	0	84.37	3	F:GO:0003677; C:GO:0005634; P:GO:0006355	F:DNA binding; C:nucleus; P:regulation of transcription, DNA-templated	IPR036093 (G3DSA:3.30.310.GENE3D); IPR003441 (PFAM); mobidb-lite (MOBIDB_LITE); mobidb-lite (MOBIDB_LITE); PTHR31079 (PANTHER); PTHR31079:SF9 (PANTHER); IPR003441 (PROSITE_PROFILES); IPR036093 (SUPERFAMILY)	F:GO:0003677; P:GO:0006355	F:DNA binding; P:regulation of transcription, DNA-templated
MdNAC62	NAC domain-containing protein 83-like	1033	20	6.31724e-177	90.37	3	F:GO:0003677; C:GO:0005634; P:GO:0006355	F:DNA binding; C:nucleus; P:regulation of transcription, DNA-templated	IPR036093 (G3DSA:3.30.310.GENE3D); IPR003441 (PFAM); mobidb-lite (MOBIDB_LITE); mobidb-lite (MOBIDB_LITE); mobidb-lite (MOBIDB_LITE); PTHR31989 (PANTHER); PTHR31989:SF159 (PANTHER); IPR003441 (PROSITE_PROFILES); IPR036093 (SUPERFAMILY)	F:GO:0003677; P:GO:0006355	F:DNA binding; P:regulation of transcription, DNA-templated
MdNAC63	NAC transcription factor 29-like	1679	20	0	80.4	3	F:GO:0003677; C:GO:0005634; P:GO:0006355	F:DNA binding; C:nucleus; P:regulation of transcription, DNA-templated	IPR003441 (PFAM); IPR036093 (G3DSA:3.30.310.GENE3D); PTHR31719:SF120 (PANTHER); PTHR31719 (PANTHER); IPR003441 (PROSITE_PROFILES); IPR036093 (SUPERFAMILY)	F:GO:0003677; P:GO:0006355	F:DNA binding; P:regulation of transcription, DNA-templated
MdNAC64	protein NTM1-like 9	1998	20	0	76.9	4	F:GO:0003677; C:GO:0005634; P:GO:0006355; C:GO:0016021	F:DNA binding; C:nucleus; P:regulation of transcription, DNA-templated; C:integral component of membrane	IPR003441 (PFAM); IPR036093 (G3DSA:3.30.310.GENE3D); mobidb-lite (MOBIDB_LITE); mobidb-lite (MOBIDB_LITE); mobidb-lite (MOBIDB_LITE); PTHR31989 (PANTHER); PTHR31989:SF239 (PANTHER); IPR003441 (PROSITE_PROFILES); IPR036093 (SUPERFAMILY)	F:GO:0003677; P:GO:0006355	F:DNA binding; P:regulation of transcription, DNA-templated
MdNAC65	NAC domain-containing protein 82-like	2353	20	0	74.93	4	F:GO:0003677; C:GO:0005634; P:GO:0006355; C:GO:0016020	F:DNA binding; C:nucleus; P:regulation of transcription, DNA-templated; C:membrane	IPR036093 (G3DSA:3.30.310.GENE3D); IPR003441 (PFAM); PTHR31989 (PANTHER); PTHR31989:SF137 (PANTHER); IPR003441 (PROSITE_PROFILES); IPR036093 (SUPERFAMILY)	F:GO:0003677; P:GO:0006355	F:DNA binding; P:regulation of transcription, DNA-templated
MdNAC67	protein CUP-SHAPED COTYLEDON 1-like isoform X1	1630	20	0	64.97	2	F:GO:0003677; P:GO:0006355	F:DNA binding; P:regulation of transcription, DNA-templated	IPR003441 (PFAM); IPR036093 (G3DSA:3.30.310.GENE3D); mobidb-lite (MOBIDB_LITE); mobidb-lite (MOBIDB_LITE); mobidb-lite (MOBIDB_LITE); mobidb-lite (MOBIDB_LITE); PTHR31989 (PANTHER); PTHR31989:SF193 (PANTHER); IPR003441 (PROSITE_PROFILES); IPR036093 (SUPERFAMILY)	F:GO:0003677; P:GO:0006355	F:DNA binding; P:regulation of transcription, DNA-templated
MdNAC68	[Leaf=Malus domestica] NAC domain class transcription factor	1274				2	F:GO:0003677; P:GO:0006355	F:DNA binding; P:regulation of transcription, DNA-templated	IPR036093 (G3DSA:3.30.310.GENE3D); IPR003441 (PFAM); mobidb-lite (MOBIDB_LITE); mobidb-lite (MOBIDB_LITE); mobidb-lite (MOBIDB_LITE); mobidb-lite (MOBIDB_LITE); PTHR31989:SF62 (PANTHER); PTHR31989 (PANTHER); IPR003441 (PROSITE_PROFILES); IPR036093 (SUPERFAMILY)	F:GO:0003677; P:GO:0006355	F:DNA binding; P:regulation of transcription, DNA-templated
MdNAC69	[Leaf=Malus domestica] NAC domain class transcription factor	1794				2	F:GO:0003677; P:GO:0006355	F:DNA binding; P:regulation of transcription, DNA-templated	IPR036093 (G3DSA:3.30.310.GENE3D); IPR003441 (PFAM); mobidb-lite (MOBIDB_LITE); mobidb-lite (MOBIDB_LITE); PTHR31989 (PANTHER); PTHR31989:SF248 (PANTHER); IPR003441 (PROSITE_PROFILES); IPR036093 (SUPERFAMILY)	F:GO:0003677; P:GO:0006355	F:DNA binding; P:regulation of transcription, DNA-templated
MdNAC70	NAC domain-containing protein 90-like	1033	20	3.28767e-164	83.82	3	F:GO:0003677; C:GO:0005634; P:GO:0006355	F:DNA binding; C:nucleus; P:regulation of transcription, DNA-templated	IPR036093 (G3DSA:3.30.310.GENE3D); IPR003441 (PFAM); mobidb-lite (MOBIDB_LITE); mobidb-lite (MOBIDB_LITE); mobidb-lite (MOBIDB_LITE); mobidb-lite (MOBIDB_LITE); PTHR31989:SF251 (PANTHER); PTHR31989 (PANTHER); IPR003441 (PROSITE_PROFILES); IPR036093 (SUPERFAMILY)	F:GO:0003677; P:GO:0006355	F:DNA binding; P:regulation of transcription, DNA-templated
